# Supplementary material for: The Role of Mild Alkaline Pretreatment in the Biorefinery Upgrade of Spent Coffee Grounds
Source: MDPI journal article supplement (doi:10.3390/en16093907), 2023-05-05
Supplement: s1 [file s1]

Archive with 1 entries (1 files):
- energies-2349360-supplementary.pdf
