# Supplementary material for: The Role of Mild Alkaline Pretreatment in the Biorefinery Upgrade of Spent Coffee Grounds
Source: MDPI journal article supplement (doi:10.3390/en16093907), 2023-05-05
Supplement: s1 [file s1 › energies-2349360-supplementary.pdf]

Supplementary Material

# The Role of Mild Alkaline Pretreatment in the Biorefinery Upgrade of Spent Coffee Grounds

Gabriel Mota Ribeiro <sup>1,2</sup>, Pedro L. Martins <sup>1</sup>, Ana Cristina Oliveira <sup>1</sup>, Flórela Carvalheiro <sup>1</sup>, Rita Fragoso <sup>2,\*</sup> and Luís C. Duarte <sup>1</sup>

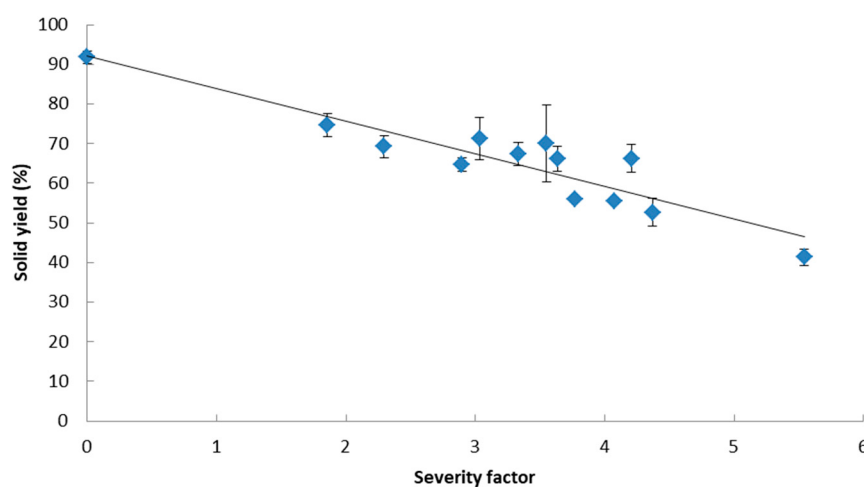

Figure S1: Effect of the mild alkaline pretreatment on solid yield as a function of the severity factor

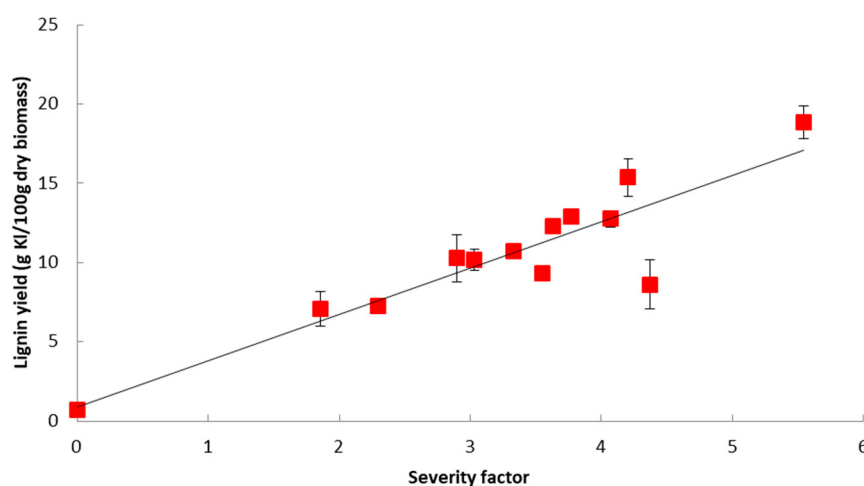

Figure S2: Effect of the mild alkaline pretreatment on Klason lignin recovery as a function of the severity factor
